# Supplementary material for: The first step in the development of text mining technology for cancer risk assessment: identifying and organizing scientific evidence in risk assessment literature
Source: Springer Nature journal article supplement (doi:10.1186/1471-2105-10-303), 2009-09-22
Supplement: 12859_2009_3033_MOESM5_ESM.pdf [file 12859_2009_3033_MOESM5_ESM.pdf]

# Toxicokinetics

Absorption, uptake, distribution, excretion

Inhalation

Blood/air partition

Urinary elimination

Bioaccumulation/  
Lipophility

Metabolism

Biodegradation

Metabolic enzymes

Biotransformation

Activation or deactivation

Cytochrome P450

Epoxide hydrolase

Glutathione conjugation

Toxicokinetic modeling

PBPK models

Physiologically based  
pharmacokinetic modeling

Toxicokinetics

Reactive oxygen species  
(ROS)

Superoxide dismutase

Oxidative species

Oxidative metabolism
